# Supplementary material
Source: ML conference proceedings conference paper supplement (https://proceedings.neurips.cc/paper_files/paper/2011/hash/c8c41c4a18675a74e01c8a20e8a0f662-Abstract.html)
Supplement: Supplementary file 1 [file c8c41c4a18675a74e01c8a20e8a0f662-Supplemental.zip]

Archive with 1 entries (1 files):
- all/Paper 946/hmm_parameter_nips-final-supplement.pdf
