# Supplementary material
Source: ML conference proceedings conference paper supplement (https://proceedings.neurips.cc/paper_files/paper/2011/hash/c8c41c4a18675a74e01c8a20e8a0f662-Abstract.html)
Supplement: Supplementary file 1 [file c8c41c4a18675a74e01c8a20e8a0f662-Supplemental.zip › all/Paper 946/hmm_parameter_nips-final-supplement.pdf]

## Supplementary Material

Here we recall how to calculate the moment-generating function  $\Lambda(n)$  via zeta-function [24] and periodic orbits [3, 1]. Let  $\lambda[A]$  be the maximal eigenvalue of matrix  $A$  with non-negative elements [13]. Since  $AB$  and  $BA$  have identical eigenvalues, we get  $\lambda[A^d] = (\lambda[A])^d$ ,  $\lambda[AB] = \lambda[BA]$  ( $d$  is an integer).

Recall the content of section 4. Eqs. (15, 3, 4) lead to

$$\Lambda^m(n, m) = \sum_{x_1, \dots, x_m} \phi[x_1, \dots, x_m], \quad (42)$$

$$\phi[x_1, \dots, x_m] \equiv \lambda \left[ \prod_{k=1}^m T_{x_k} \right] \lambda^n \left[ \prod_{k=1}^m \hat{T}_{x_k} \right] \quad (43)$$

where we have introduced a notation  $T_x = T(x)$  for better readability. We obtain

$$\phi[\mathbf{x}', \mathbf{x}'] = \phi[\mathbf{x}'', \mathbf{x}'], \quad \phi[\mathbf{x}', \mathbf{x}'] = \phi^2[\mathbf{x}'], \quad (44)$$

where  $\mathbf{x}'$  and  $\mathbf{x}''$  are arbitrary sequences of symbols  $x_i$ . One can prove for  $\Lambda^m(n, m)$  [24]:

$$\Lambda^m(n, m) = \sum_{k|m} \sum_{(\gamma_1, \dots, \gamma_k) \in \text{Per}(k)} k [\phi[\gamma_1, \dots, \gamma_k]]^{\frac{m}{k}},$$

where  $\gamma_i = 1, \dots, M$  are the indices referring to realizations of the HMM, and where  $\sum_{k|m}$  means that the summation goes over all  $k$  that divide  $m$ , e.g.,  $k = 1, 2, 4$  for  $m = 4$ . Here  $\text{Per}(k)$  contains sequences  $\Gamma = (\gamma_1, \dots, \gamma_k)$  selected according to the following rules: *i)*  $\Gamma$  turns to itself after  $k$  successive cyclic permutations, but does not turn to itself after any smaller (than  $k$ ) number of successive cyclic permutations; *ii)* if  $\Gamma$  is in  $\text{Per}(k)$ , then  $\text{Per}(k)$  contains none of those  $k-1$  sequences obtained from  $\Gamma$  under  $k-1$  successive cyclic permutations. Starting from (45) and introducing notations  $p = k$ ,  $q = \frac{m}{k}$ , we transform  $\xi(z, n)$  as

$$\xi(z, n) = \exp \left[ - \sum_{p=1}^{\infty} \sum_{\Gamma \in \text{Per}(p)} \sum_{q=1}^{\infty} \frac{z^{pq}}{q} \phi^q[\gamma_1, \dots, \gamma_p] \right].$$

The summation over  $q$ ,  $\sum_{q=1}^{\infty} \frac{z^{pq}}{q} \phi^q[\gamma_1, \dots, \gamma_p] = -\ln[1 - z^p \phi[\gamma_1, \dots, \gamma_p]]$ , yields

$$\begin{aligned} \xi(z, n) &= \prod_{p=1}^{\infty} \prod_{\Gamma \in \text{Per}(p)} [1 - z^p \phi[\gamma_1, \dots, \gamma_p]] \\ &= 1 - z \sum_{l=1}^M \lambda_l \hat{\lambda}_l^n + \sum_{k=2}^{\infty} \varphi_k z^k, \end{aligned} \quad (45)$$

where  $\lambda_{\alpha \dots \beta} \equiv \lambda[T_{x_{\alpha}} \dots T_{x_{\beta}}]$ ,  $\lambda_{\alpha+\beta} \equiv \lambda[T_{x_{\alpha}}] \lambda[T_{x_{\beta}}]$  (all the notations introduced generalize—via introducing a hat—to functions with trial values of the parameters, e.g.,  $\hat{T}_2$ ).  $\varphi_k$  are obtained from (45). We write them down assuming that  $M = 2$  (two realizations of the observed process)

$$\varphi_2 = -\lambda_{12} \hat{\lambda}_{12}^n + \lambda_{1+2} \hat{\lambda}_{1+2}^n, \quad (46)$$

$$\varphi_3 = \lambda_{2+21} \hat{\lambda}_{2+21}^n - \lambda_{221} \hat{\lambda}_{221}^n + \lambda_{1+12} \hat{\lambda}_{1+12}^n - \lambda_{112} \hat{\lambda}_{112}^n, \quad (47)$$

$$\begin{aligned} \varphi_4 &= -\lambda_{1222} \hat{\lambda}_{1222}^n + \lambda_{2+122} \hat{\lambda}_{2+122}^n + \lambda_{1+122} \hat{\lambda}_{1+122}^n - \lambda_{1122} \hat{\lambda}_{1122}^n \\ &+ \lambda_{2+211} \hat{\lambda}_{2+211}^n - \lambda_{1+2+12} \hat{\lambda}_{1+2+12}^n + \lambda_{1+211} \hat{\lambda}_{1+211}^n - \lambda_{1112} \hat{\lambda}_{1112}^n. \end{aligned} \quad (48)$$

The algorithm for calculating  $\varphi_{k \geq 5}$  is straightforward [1]. Eqs. (46–48) for  $\varphi_{k \geq 4}$  suffice for approximate calculation of (45), where the infinite sum  $\sum_{k=2}^{\infty}$  is approximated by its first few terms.

We now calculate  $\xi(z, n)$  for the specific model considered in Section 5.1. For this model, only the first row of  $T_1$  consists of non-zero elements, so we have

$$\lambda_{1\chi 1\sigma} = \lambda_{1\chi+1\sigma}, \quad \hat{\lambda}_{1\chi 1\sigma} = \hat{\lambda}_{1\chi+1\sigma}, \quad (49)$$

where  $\chi$  and  $\sigma$  are arbitrary sequences of 1's and 2's. The origin of (49) is that the transfer-matrices  $T(1)T(\chi_1)T(\chi_2) \dots$  and  $T(1)T(\sigma_1)T(\sigma_2) \dots$  that correspond to  $1\chi$  and  $1\sigma$ , respectively, have the

same structure as  $T(1)$ , where only the first row differs from zero. For  $\varphi_k$  in (45) the feature (49) implies

$$\begin{aligned}\varphi_k &= -\lambda^n [\hat{T}_1 \hat{T}_2^{k-1}] \lambda [T_1 T_2^{k-1}] \\ &+ \lambda^n [\hat{T}_1 \hat{T}_2^{k-2}] \lambda [T_1 T_2^{k-2}] \lambda^n [\hat{T}_2] \lambda [T_2].\end{aligned}\quad (50)$$

To calculate  $\lambda [T_1 T_2^p]$  for an integer  $p$  one diagonalizes  $T_2$  [13] (the eigenvalues of  $T_2$  are generically not degenerate, hence it is diagonalizable),

$$T_2 = \sum_{\alpha=1}^L \tau_\alpha |R_\alpha\rangle \langle L_\alpha|, \quad (51)$$

where  $\tau_\alpha$  are the eigenvalues of  $T_2$ , and where  $|R_\alpha\rangle$  and  $|L_\alpha\rangle$  are, respectively, the right and left eigenvectors:

$$T_2 |R_\alpha\rangle = \tau_\alpha |R_\alpha\rangle, \quad \langle L_\alpha | T_2 = \tau_\alpha \langle L_\alpha|, \quad \langle L_\alpha | R_\beta\rangle = \delta_{\alpha\beta}.$$

Here  $\delta_{\alpha\beta}$  is the Kronecker delta. Note that generically  $\langle L_\alpha | L_\beta\rangle \neq \delta_{\alpha\beta}$  and  $\langle R_\alpha | R_\beta\rangle \neq \delta_{\alpha\beta}$ . Here  $\langle L_\alpha|$  is the transpose of  $|L_\alpha\rangle$ , while  $|R_\alpha\rangle \langle L_\alpha|$  is the outer product.

Now  $\lambda [T_1 T_2^p]$  reads from (22):

$$\lambda [T_1 T_2^p] = \sum_{\alpha=1}^L \tau_\alpha^p \psi_\alpha, \quad \psi_\alpha \equiv \langle 1 | T_1 | R_\alpha\rangle \langle L_\alpha | 1\rangle, \quad (52)$$

where  $\langle 1| = (1, 0, \dots, 0)$ . Combining (52, 50) and (45) we arrive at (23).
